# Supplementary material for: SETD7 is a novel therapeutic target for multiple myeloma with t(11;14)+
Source: Research Square preprint supplement (doi:10.21203/rs.3.rs-7431598/v1), 2025-09-03
Supplement: Supplementary file 1 [file 74b8e3522b5271aadcb850f8.pdf]

Figure S1

A

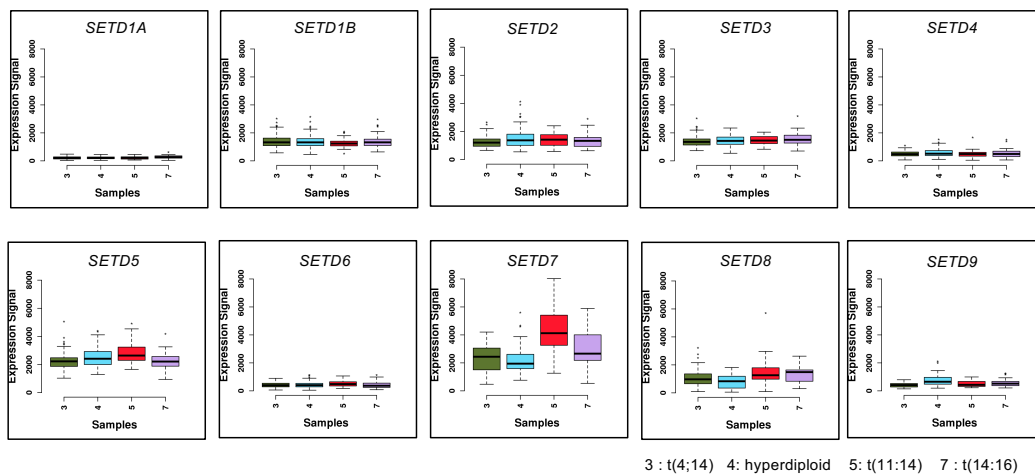

B

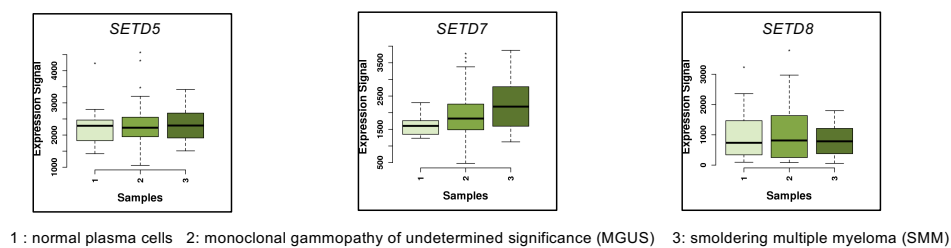

C

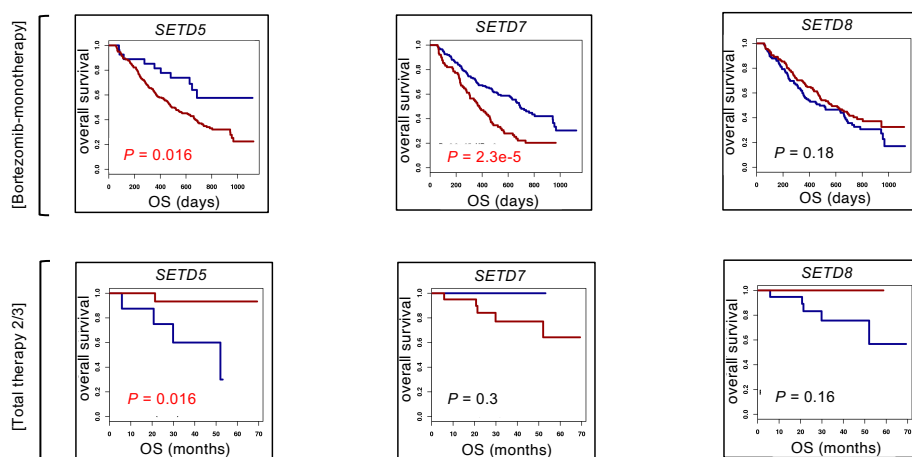

**Supplemental Figure S1.**

(A) Using the GenomicScape tool ([www.genomicscape.com](http://www.genomicscape.com)), we examined the gene expression of SET family HMTs in MM cells in the indicated groups. (B) We examined the gene expressions of SETD5, SETD7, and SETD8 in CD138-positive cells derived from normal healthy individuals (normal plasma cells), monoclonal gammopathy of undetermined significance (MGUS), and smoldering multiple myeloma (SMM) patients. (C) Kaplan–Meier curves of MM patients receiving bortezomib monotherapy (GEO accession number [GSE9782]) or total therapy 2/3 [GSE4581] in the indicated groups with high (red) or low (blue) expression. *P*-values were determined by log-rank test.

Figure S2

A

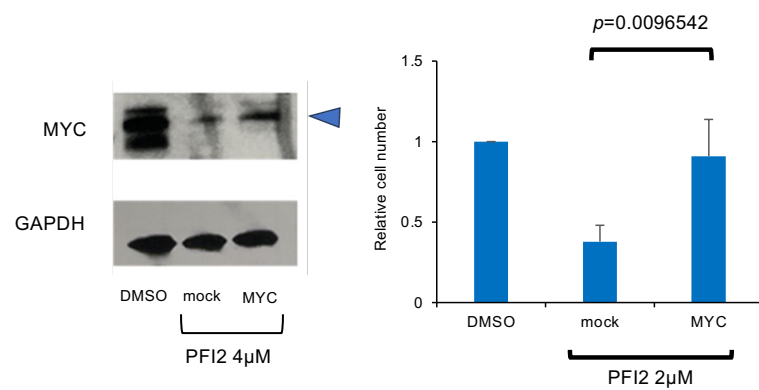

B

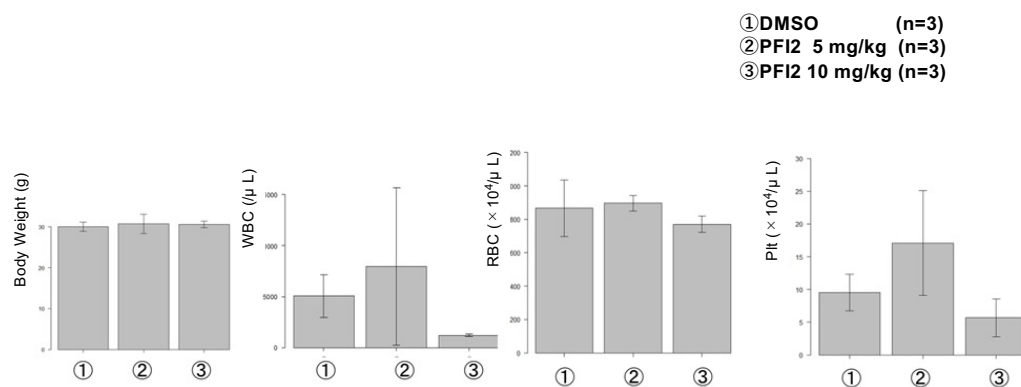

### **Supplemental Figure S2.**

(A) KMS12-BM cells were transduced with an empty lentiviral vector (mock) or MYC-overexpressing vector (MYC) to establish stable transformants. Left panel: We cultured each transformant in the absence or presence of 4  $\mu$ M PFI2 for 24 h. The expression level of MYC protein was determined by immunoblotting. An arrow head indicates transduced MYC protein. Right panel: The sublines were cultured in the presence or absence of 2  $\mu$ M PFI2 for 72 h. Cell proliferation was assessed by MTT reduction assay and the data is shown relative to that of the corresponding untreated controls. Data are the means  $\pm$  S.D. (bars) of multiple independent experiments ( $n = 3$ );  $P$ -values were determined by one-way ANOVA with a Tukey's multiple comparison test. (B) Balb/c mice ( $n=3$ ) were administered DMSO vehicle control or PFI2 at the indicated dose twice a week for 3 weeks. We measured body weights, and counts of white blood cells (WBC), red blood cells (RBC), and platelets (PLT) in the peripheral blood of mice at day 21. The mean  $\pm$  S.D. (bars) is shown.  $P$ -values were determined by one-way ANOVA with a Tukey's multiple comparison test.

Figure S3

**A**

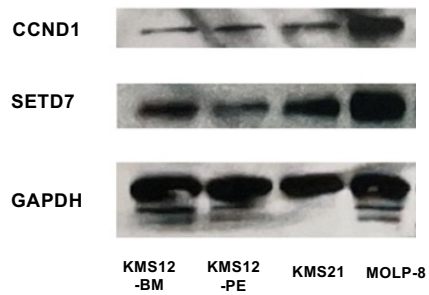

**B**

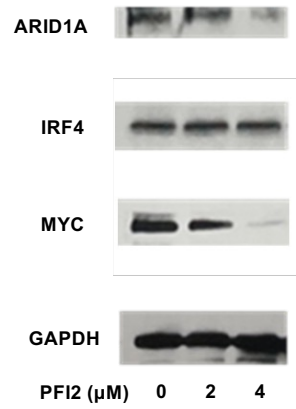

**C**

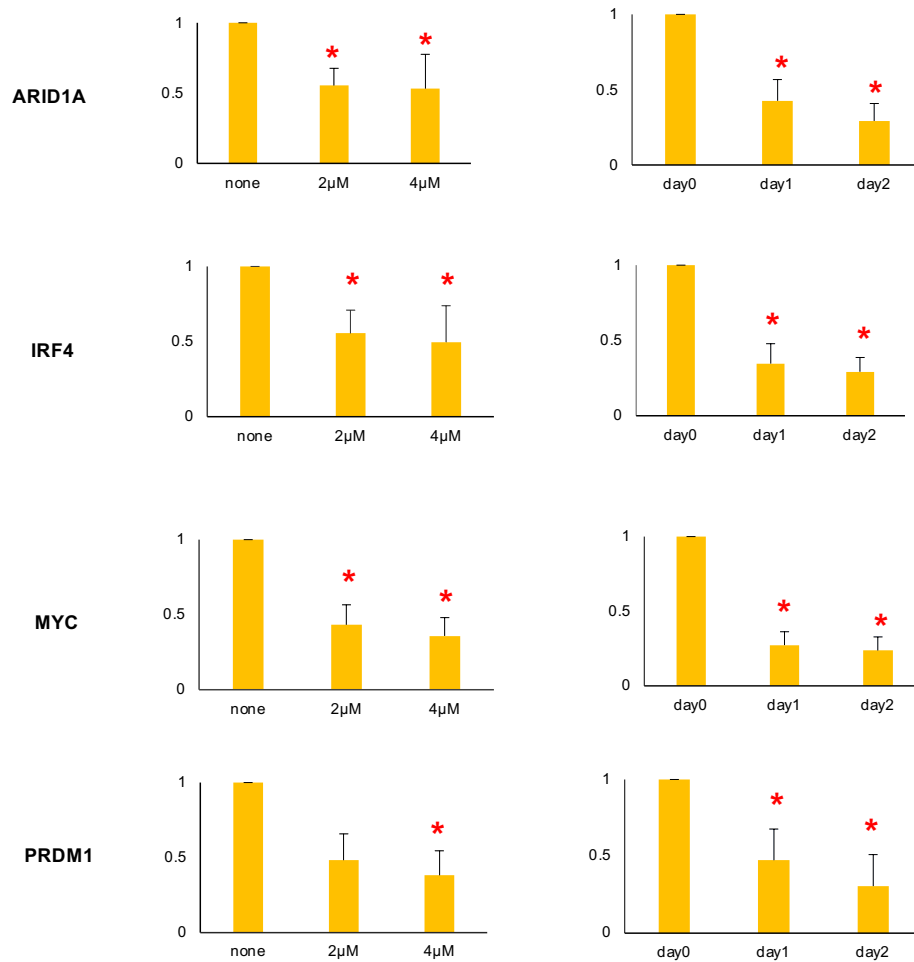

### Supplemental Figure S3.

(A) Whole cell lysates were obtained from MM cell lines harboring t(11;14) including KMS12-PE and subjected to immunoblotting for SETD7, CCND1, and GAPDH proteins (loading control). (B) KMS12-PE cells were cultured with various concentrations of PFI2 for 24 h. Whole cell lysates were obtained and subjected to immunoblotting for ARID1A, IRF4, MYC, and GAPDH proteins (loading control). (C) KMS12-PE cells were cultured with various concentrations of PFI2 for 24 h or in the presence of 2 $\mu$ M PFI2 for the indicated periods. The expression levels of *ARID1A*, *IRF4*, *PRDM1*, and *MYC* along with GAPDH by QPCR are shown. Data were quantified by the  $2^{-\Delta\Delta C_t}$  method using GAPDH as a reference and are shown as fold changes. The means  $\pm$  SD (bars) of three independent experiments. \* $P < 0.05$  by one-way ANOVA with a Tukey's multiple comparison test.
